# Supplementary material for: Turning up the spin, turning on single-molecule magnetism: from S = 1 to S = 7 in a [Mn8] cluster via ligand induced structural distortion
Source: Royal Society of Chemistry journal article supplement (doi:10.1039/b703089d), 2007-01-01
Supplement: b703089d.pdf [file b703089d.pdf]

## Turning up the spin, turning on single-molecule magnetism: from $S = 1$ to $S = 7$ in a $[\text{Mn}_8]$ cluster *via* ligand induced structural distortion

Constantinos J. Milios, Ross Inglis, Alina Vinslava, Alessandro Prescimone, Simon Parsons, Spyros P. Perlepes, George Christou and Euan K. Brechin\*

### Supplementary Information

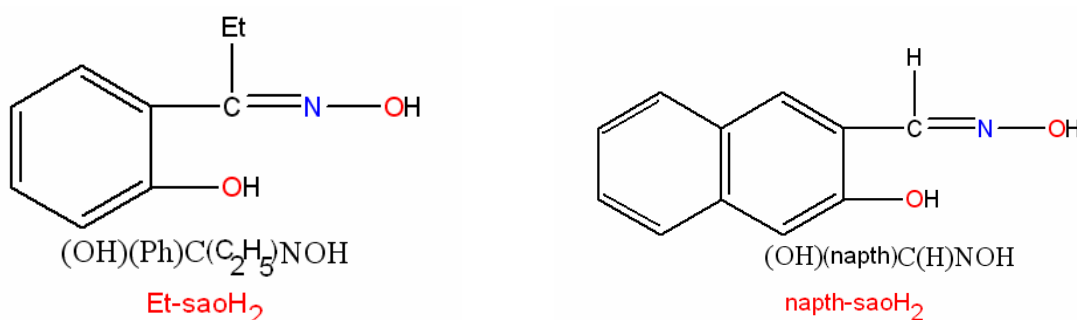

**Scheme S11.** The ligands discussed in the text.

#### Complex 2

The complex analysed as (C, H, N) 2:3 MeOH, expected (found): C, 42.28 (42.36); H, 3.96 (3.85); N, 15.37 (15.29). Diffraction data were collected with Mo-K $\alpha$  radiation ( $\lambda = 0.71073 \text{ \AA}$ ) on an Bruker Smart Apex CCD Diffractometer. Crystal Data<sup>10</sup>: C<sub>84</sub> H<sub>114</sub> Mn<sub>8</sub> N<sub>24</sub> O<sub>32</sub>, M = 2411.5, dark brown block, Triclinic, P-1, a = 13.8273(3), b = 15.3275(3), c = 15.5166(4)  $\text{\AA}$ ,  $\alpha = 111.6580(10)$ ,  $\beta = 109.8920(10)$ ,  $\gamma = 102.6120(10)^\circ$ , V = 2642.14(10)  $\text{\AA}^3$ , 61412 reflections collected of which 14863 were independent (Rint = 0.0506), 694 parameters and 12 restraints, R1 = 0.0492 [based on  $F > 4\sigma(F)$ ], wR2 = 0.1174 (based on  $F^2$  and all data). CCDC 638207. See <http://www.rsc.org/suppdata/cc/b7/b703089d/> for crystallographic data in .cif or other electronic format

#### Complex 3

The complex analysed as (C, H, N) 3:2 MeOH, expected (found): C, 35.93 (36.02); H, 4.26 (4.20); N, 17.34 (17.27). Diffraction data were collected with Mo-K $\alpha$  radiation ( $\lambda = 0.71073 \text{ \AA}$ ) on an Bruker Smart Apex CCD Diffractometer. Crystal Data<sup>10</sup>, C<sub>66</sub> H<sub>114</sub> Mn<sub>8</sub> N<sub>24</sub> O<sub>32</sub>, M = 2195.3, black blocks, Triclinic, P-1, a = 11.698(2), b = 12.608(3), c = 17.019(3)  $\text{\AA}$ ,  $\alpha = 76.05(3)$ ,  $\beta = 82.03(3)$ ,  $\gamma = 75.41(3)^\circ$ , V = 2349.4(9)  $\text{\AA}^3$ , 67762 reflections collected of which 9606 were independent (Rint = 0.103), 496 parameters and 18 restraints, R1 = 0.0698 [based on  $F > 4\sigma(F)$ ], wR2 = 0.0574 (based on  $F$  using the  $I > 2\sigma(I)$  data). CCDC 638208. See <http://www.rsc.org/suppdata/cc/b7/b703089d/> for crystallographic data in .cif or other electronic format

**Figure S11**

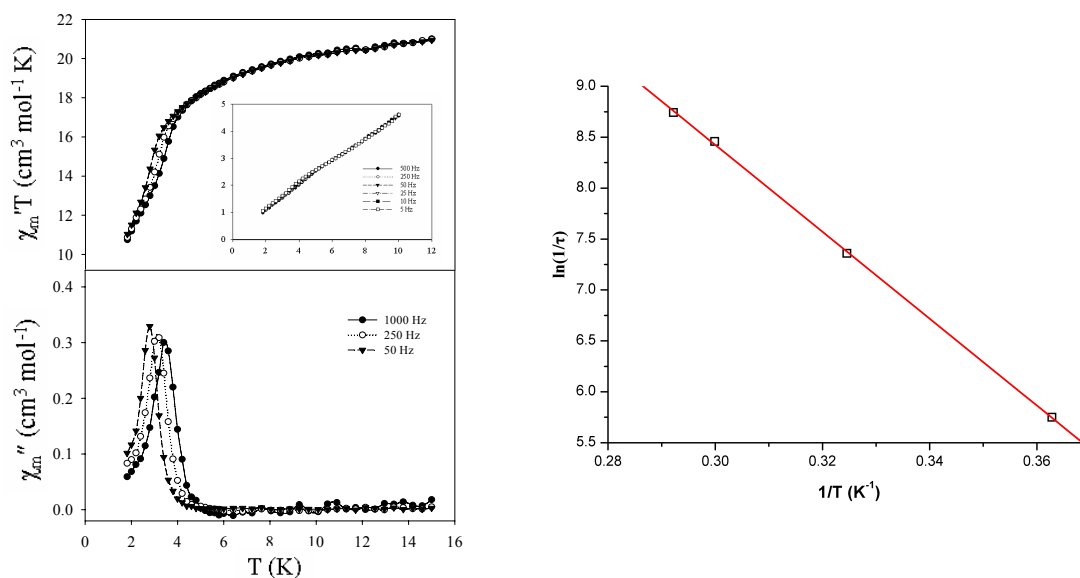

In-phase (plotted as  $\chi_M'/T$ ) and out-of-phase ac susceptibility measurements for **3** at the indicated temperature and frequency ranges (left). The inset shows  $\chi_M'/T$  vs  $T$  for complex **2**. Arrhenius plot for **3** using the ac ( $\chi_M''$ ) data. The solid line is a fit of the data yielding  $U_{\text{eff}} = 44.6$  K and  $\tau_0 = 6.05 \times 10^{-10}$  s.
